# Supplementary material for: Microfluidic generation of graphene beads for supercapacitor electrode materials
Source: Royal Society of Chemistry journal article supplement (doi:10.1039/c5ta05095b), 2015-01-01
Supplement: c5ta05095b1.pdf [file c5ta05095b1.pdf]

Electronic Supplementary Information

## Microfluidic generation of graphene beads for supercapacitor electrode materials

Linlin Zang,<sup>a</sup> Xiaojian Cao,<sup>a</sup> Yanhong Zhang,<sup>b</sup> Liguo Sun,<sup>\*b</sup> Chuanli Qin<sup>b</sup> and Cheng Wang<sup>\*a</sup>

<sup>a</sup>Key Laboratory of Functional Inorganic Material Chemistry (MOE), Heilongjiang University, Harbin, 150080, China

<sup>b</sup>Key Laboratory of Chemical Engineering Process & Technology for High-efficiency Conversion, College of Heilongjiang Province, School of Chemical Engineering and Materials, Heilongjiang University, Harbin, 150080, China

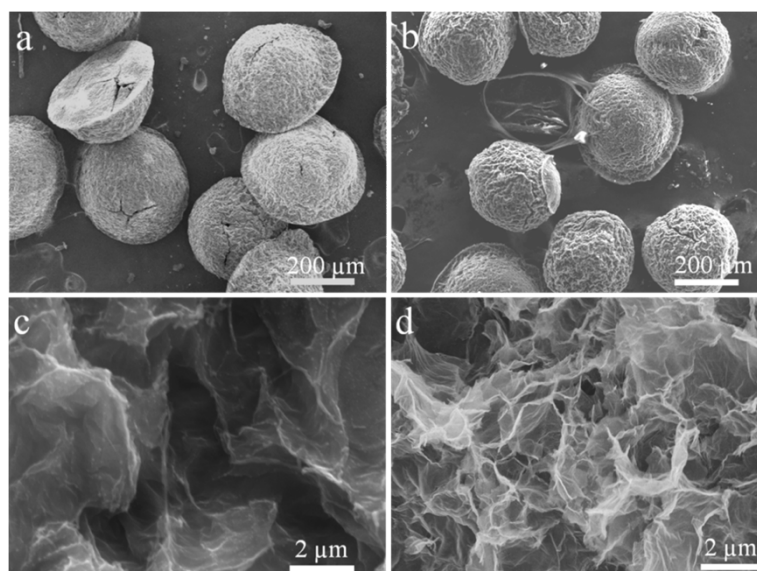

**Fig. S1** SEM images of solid GBs prepared by mode a: (a) w (GO) = 0.80%,  $v_1 : v_2 = 1 : 120$ , (b) w (GO) = 0.80%,  $v_1 : v_2 = 0.8 : 120$ , (c) and (d) were SEM images of their internal and external structure, respectively.

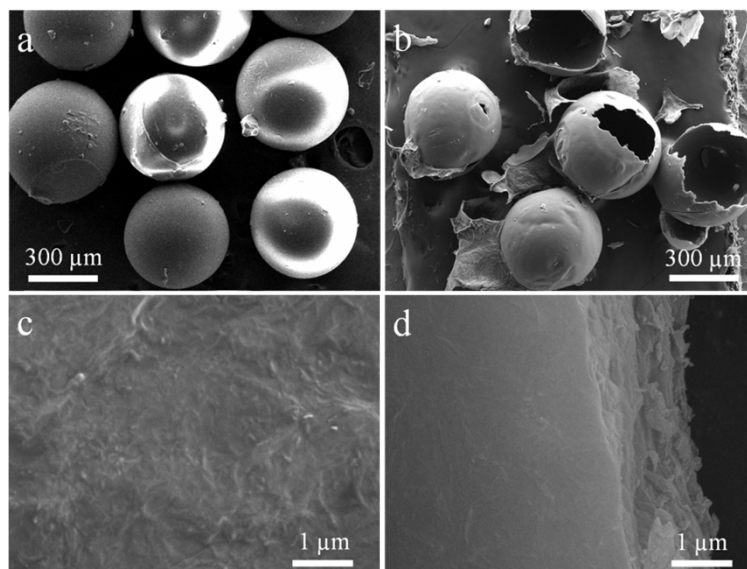

**Fig. S2** SEM images of hollow GBs prepared by mode a:  $w(\text{GO}) = 0.1\%$ ,  $v_1: v_2 = 1:120$ , (a) and (b) were SEM images of hollow GBs, (c) and (d) were SEM images of external and section, respectively.

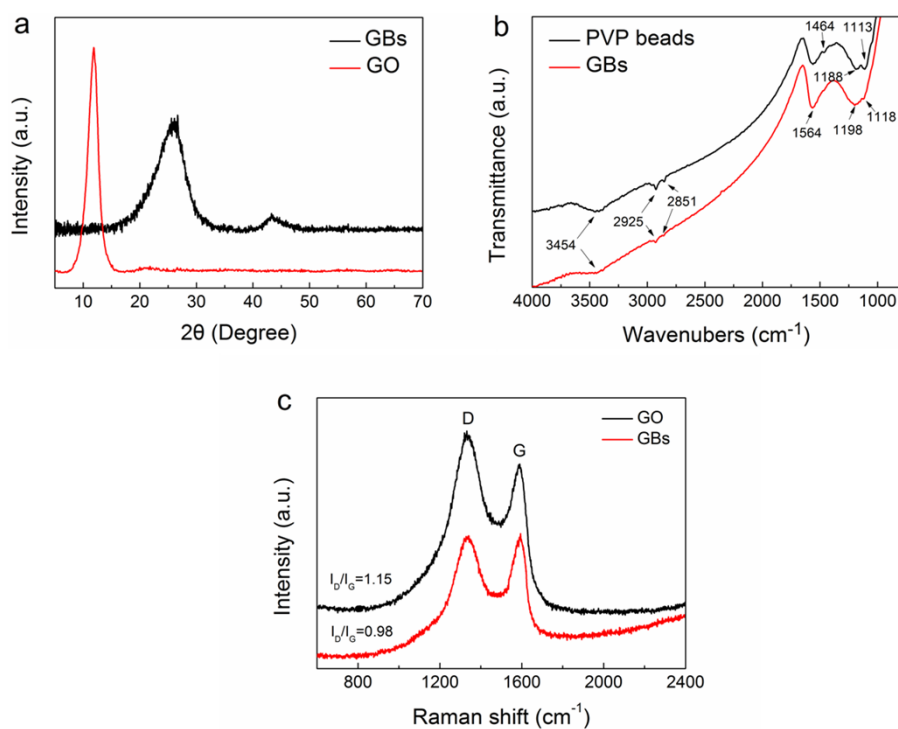

**Fig. S3** (a) XRD patterns of GO and GBs. (b) FTIR spectra of PVP beads and GBs. (c) Raman spectra of GO and GBs. GBs were prepared by mode (a), and  $w(\text{GO}) = 0.45\%$ ,  $v_1: v_2 = 0.5:120$ .

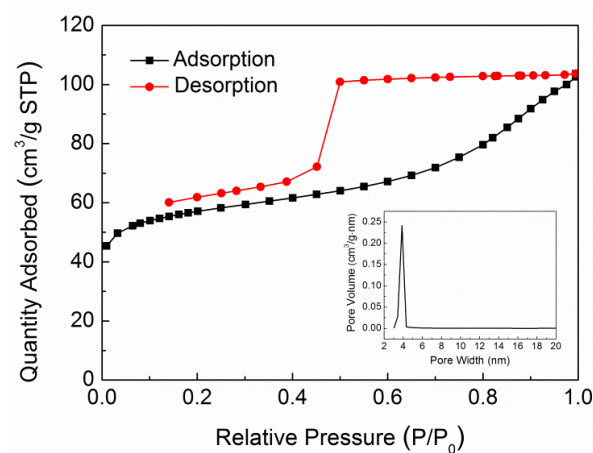

**Fig. S4** Isothermal curve for nitrogen adsorption-desorption of the GBs and corresponding pore size distribution (insert picture). GBs were prepared by mode (a), and  $w(\text{GO}) = 0.45\%$ ,  $v_1 : v_2 = 0.5 : 120$ .

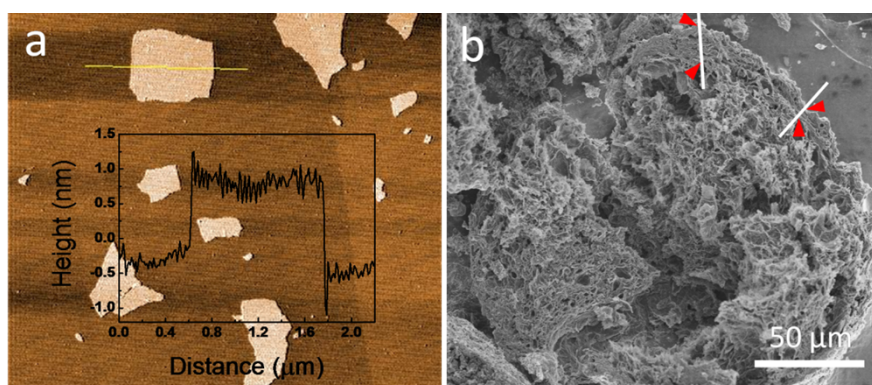

**Fig. S5** (a) AFM image (insert was the corresponding height profile) and (b) SEM image of the crushed GBs. GBs were prepared by mode (a), and  $w(\text{GO}) = 0.45\%$ ,  $v_1 : v_2 = 0.5 : 120$ .

**Preparation of PVP beads:** PVP solution was consisting of 0.5 g PVP powder and 7.5 mL deionized water. After strong stirring, PVP beads were prepared by the mode (a) of the same device, and pushing speed ratio ( $v_1 : v_2$ ) was 0.5:120.

PVP beads had well spherical structure and uniform size as shown in Fig.S6a. The SEM image of the crushed PVP beads indicated that the beads had hollow structure after the carbonization process.

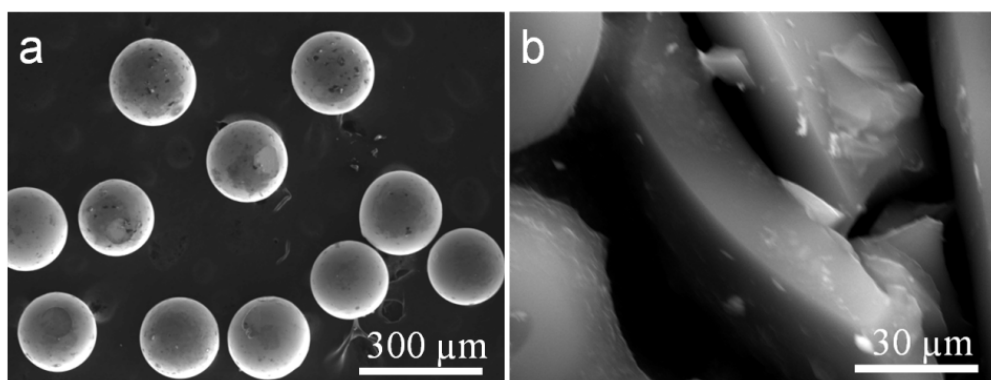

**Fig. S6** SEM images of PVP beads (a) and the crushed PVP beads (b).

Fig.S7 was the XRD pattern of PVP beads. It can be seen that there were two peaks in  $25.8^\circ$  and  $43^\circ$ , which corresponded to the graphic (002) and (100) profile, respectively.

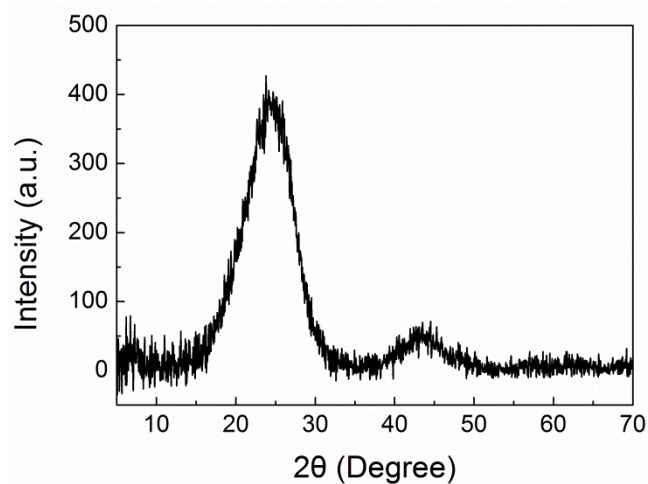

**Fig. S7** XRD pattern of PVP beads.

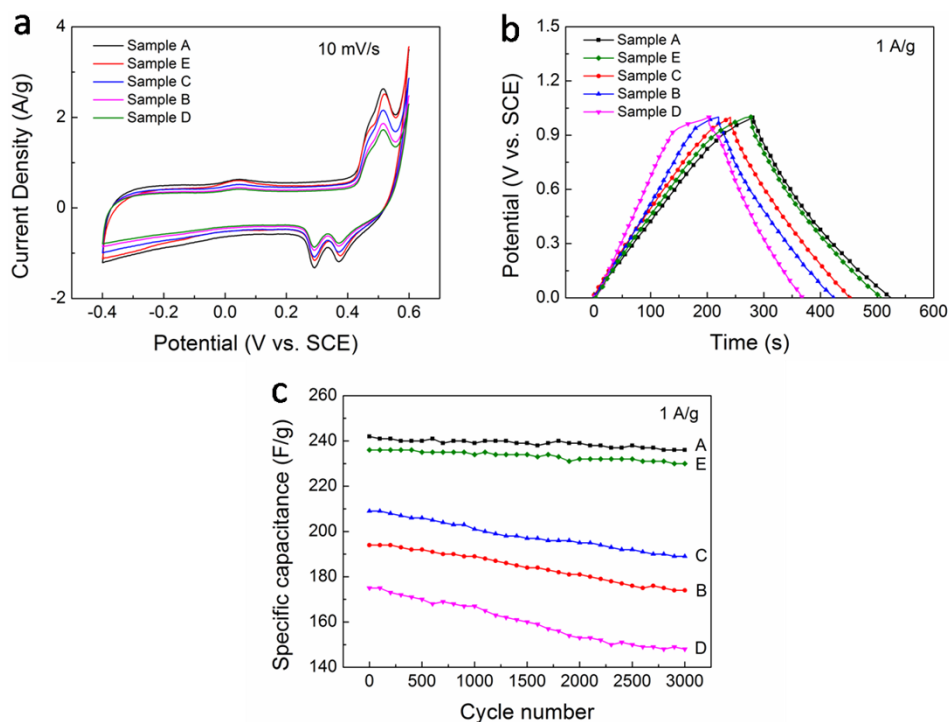

**Fig. S8** (a) CV curves of sample A-E at 10 mV/s. (b) GV curves of sample A-E in a current density of  $1 \text{ A} \cdot \text{g}^{-1}$ . (c) Charge-discharge cycling test of sample A-E in  $1 \text{ A} \cdot \text{g}^{-1}$ . The detail experimental parameters of A-E were shown in Table S1.

Table S1 The electrochemical performance of GBs (sample A-E) with different GO content, the size of droplets and the pushing rate ratio

| <b>Sample</b> | <b>solidification method</b> | <b>w (GO)%</b> | <b>v<sub>1</sub>:v<sub>2</sub></b> | <b>size (μm)</b> | <b>specific capacitance (F/g)</b> | <b>retention ratio (%)</b> |
|---------------|------------------------------|----------------|------------------------------------|------------------|-----------------------------------|----------------------------|
| A             | mode a                       | 0.45           | 0.5:120                            | 184              | 243                               | 97.5                       |
| B             | mode a                       | 0.80           | 1.0:120                            | 335              | 194                               | 89.8                       |
| C             | mode a                       | 0.80           | 0.8:120                            | 298              | 209                               | 90.3                       |
| D             | mode a                       | 0.10           | 1.0:120                            | 387              | 175                               | 84.7                       |
| E             | mode b                       | 0.45           | 0.5:120                            | 162              | 236                               | 97.9                       |
